# Supplementary material for: WNT10A Plays an Oncogenic Role in Renal Cell Carcinoma by Activating WNT/β-catenin Pathway
Source: PLOS journal article supplement (doi:10.1371/journal.pone.0047649), 2012-10-19

Figure S1

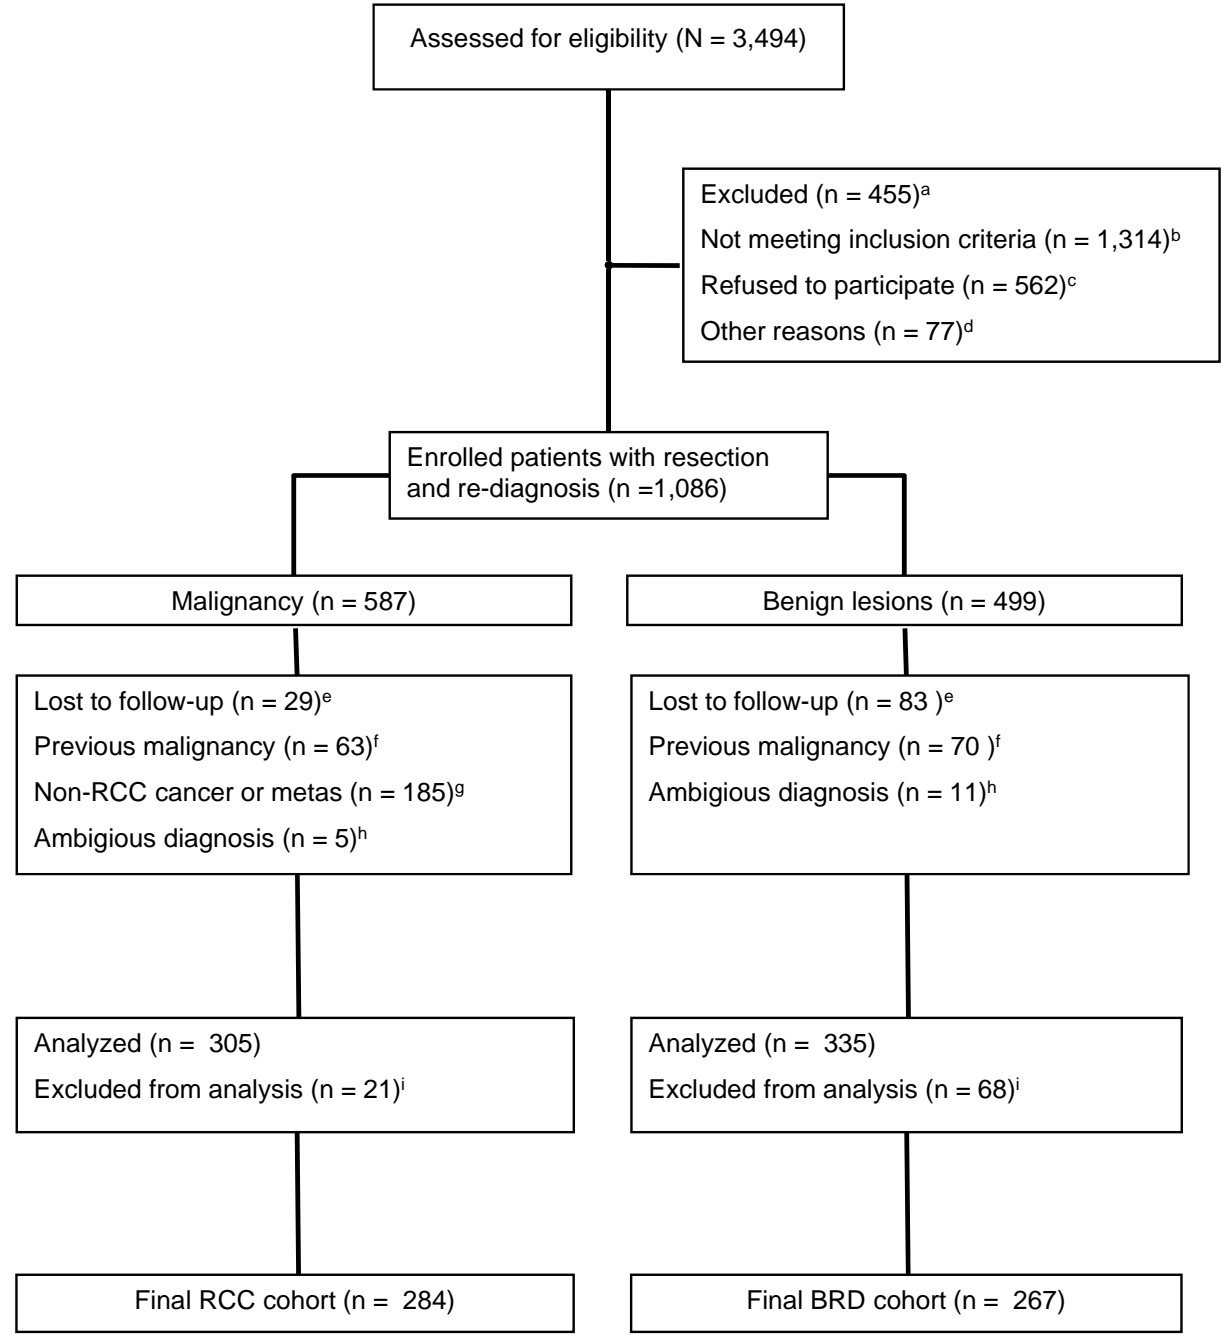

Supplement: S1 (10.1371/journal.pone.0047649.s001) [file journal.pone.0047649.s001]
