# Supplementary material for: WNT10A Plays an Oncogenic Role in Renal Cell Carcinoma by Activating WNT/β-catenin Pathway
Source: PLOS journal article supplement (doi:10.1371/journal.pone.0047649), 2012-10-19

Figure S2

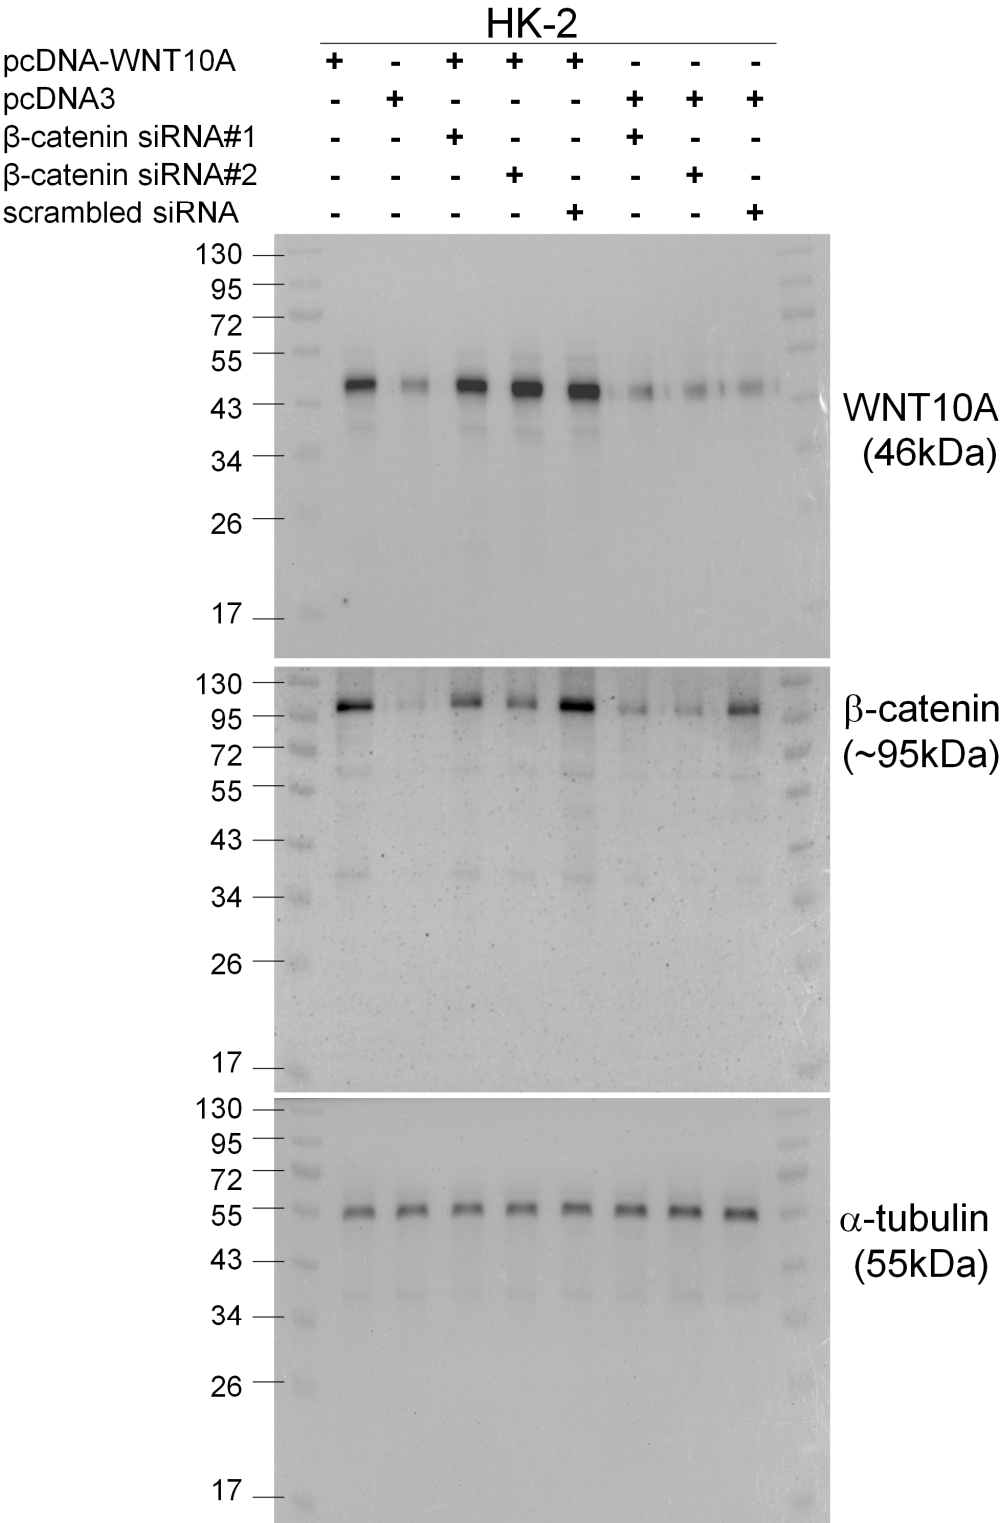

|                 | Caki-1 |   |   |   | RCC-1 |   |   |   |
|-----------------|--------|---|---|---|-------|---|---|---|
| Reagent control | +      | - | - | - | +     | - | - | - |
| scrambled siRNA | -      | + | - | - | -     | + | - | - |
| WNT10A siRNA#1  | -      | - | + | - | -     | - | + | - |
| WNT10A siRNA#2  | -      | - | - | + | -     | - | - | + |

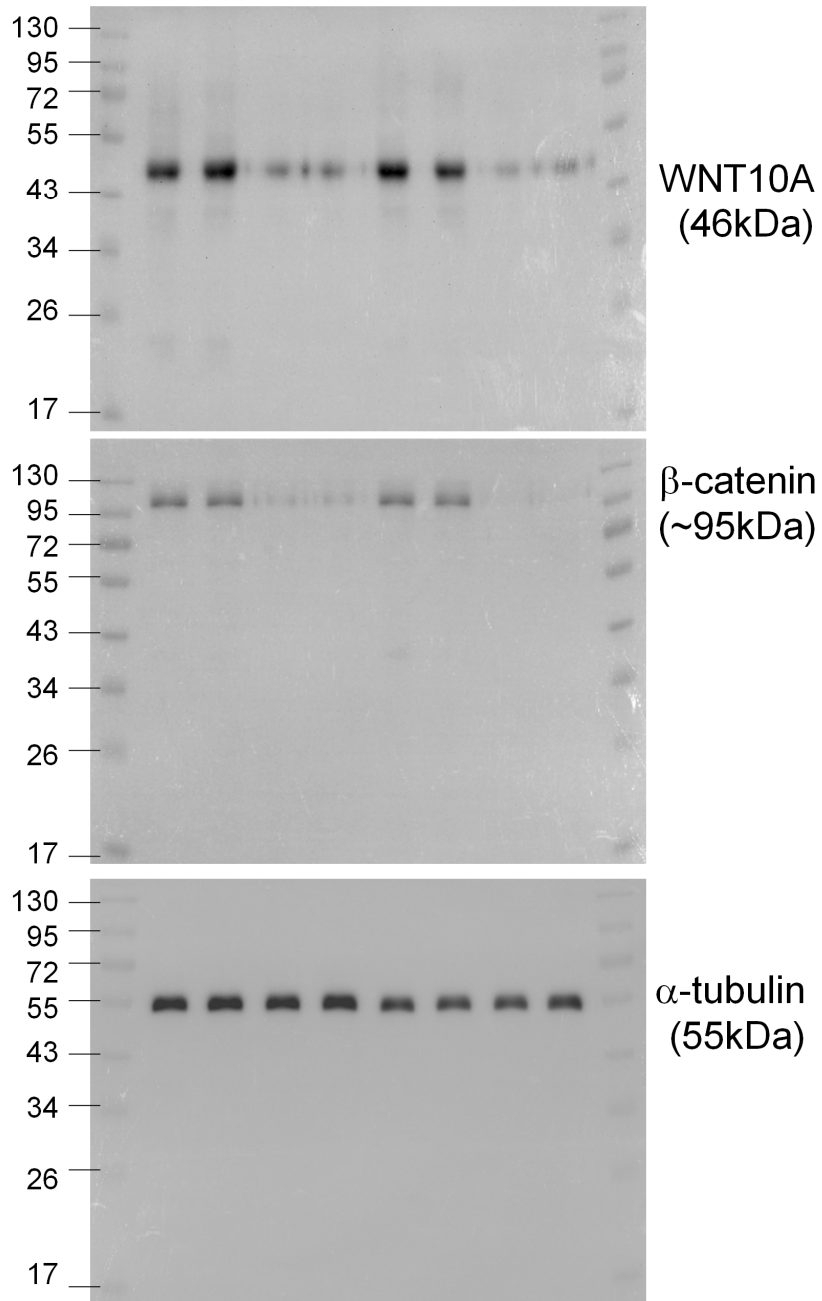

Supplement: S2 (10.1371/journal.pone.0047649.s002) [file journal.pone.0047649.s002]
